# Supplementary material for: Engineering the Stability of Nanozyme-Catalyzed Product for Colorimetric Logic Gate Operations
Source: MDPI journal article supplement (doi:10.3390/molecules26216494), 2021-10-27
Supplement: s1 [file s1]

# Engineering the Stability of Nanozyme-catalyzed Product for Colorimetric Logic Gate Operations

Lianlian Fu <sup>1,\*†</sup>, Deshuai Yu <sup>2,†</sup>, Dijuan Zou <sup>1</sup>, Hao Qian <sup>1</sup> and Youhui Lin <sup>2,\*</sup>

1 College of Material Science and Engineering, Huaqiao University, Xiamen 361021, China; 20013081065@stu.hqu.edu.cn (D.Z.); hquqh@126.com (H.Q.)

2 Department of Physics, Research Institute for Biomimetics and Soft Matter, Fujian Provincial Key Laboratory for Soft Functional Materials Research, Xiamen University, Xiamen 361005, China; yudeshuai117@163.com (D.Y.)

\* Correspondence: flf@hqu.edu.cn (L.F.); linyouhui@xmu.edu.cn (Y.L.)

† These authors contributed equally to this work.

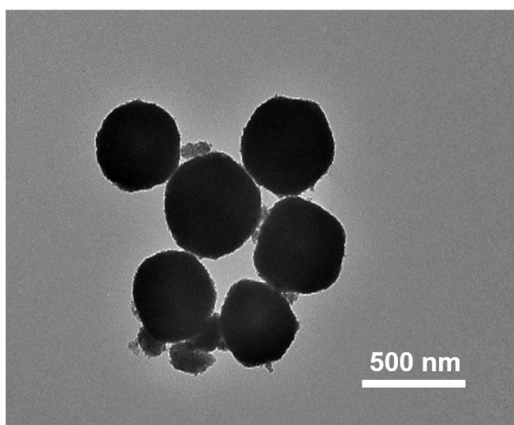

Figure S1. TEM image of Fe<sub>3</sub>O<sub>4</sub> NPs.

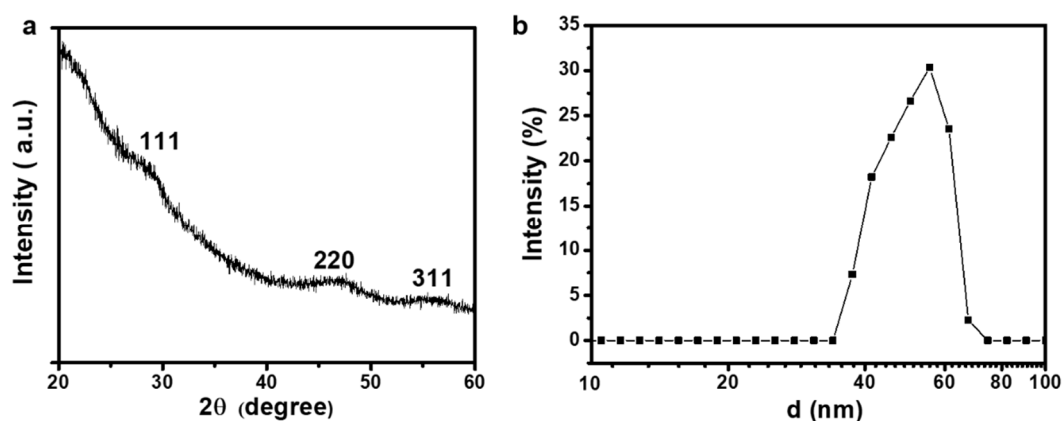

Figure S2. (a) Wide-angle powder XRD pattern and (b) size distribution of the CeO<sub>2</sub> NPs.

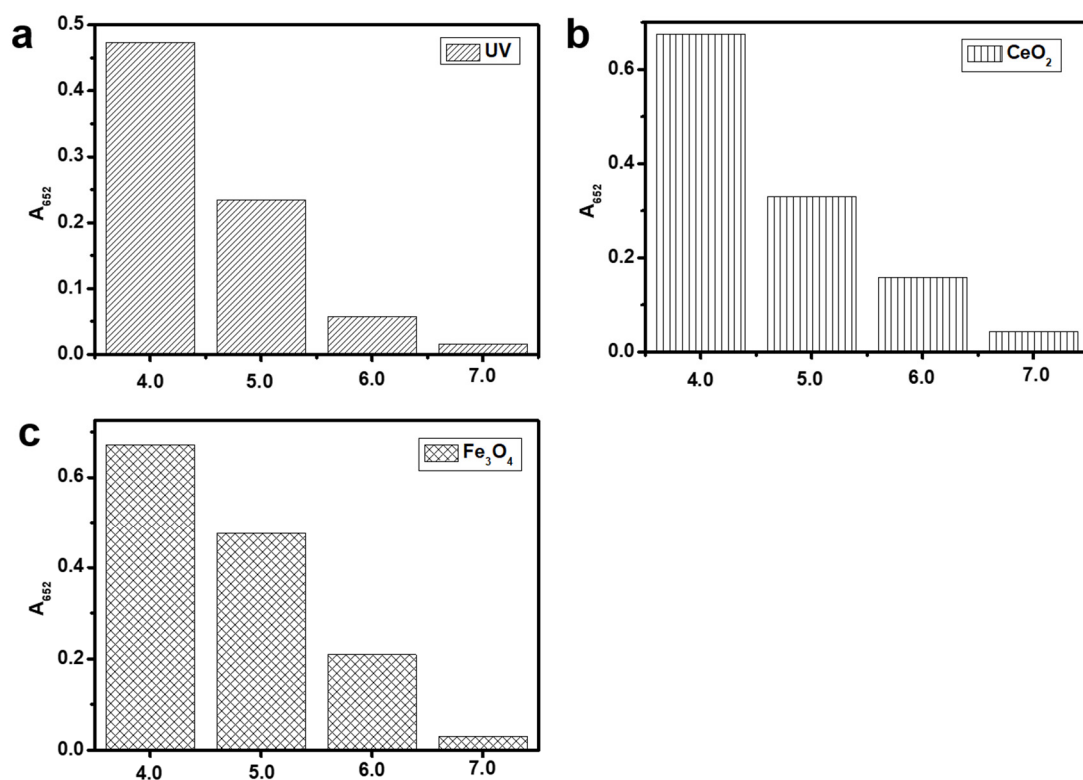

**Figure S3.** Absorbance intensity at 652 nm of TMB reaction solutions at 35 °C for 15 min treated by (a) UV-light, (b)  $\text{CeO}_2$  NPs, and (c)  $\text{Fe}_3\text{O}_4$  NPs and  $\text{H}_2\text{O}_2$  under different pH. ([TMB] = 120  $\mu\text{M}$ , [ $\text{CeO}_2$  NPs] = 2  $\mu\text{g/mL}$ , [ $\text{Fe}_3\text{O}_4$  NPs] = 4  $\mu\text{g/mL}$ , [ $\text{H}_2\text{O}_2$ ] = 5 mM, [citrate buffer] = 40 mM).

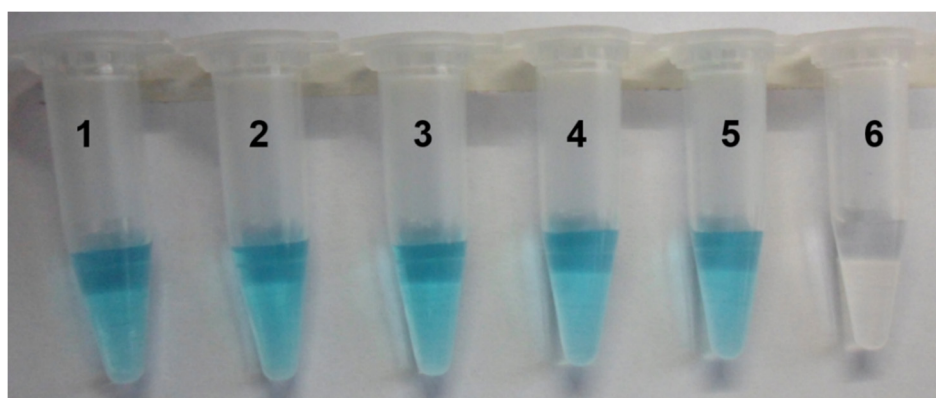

**Figure S4.** Effect of various saccharides on the appearance properties of oxTMB/GOx reaction solutions at 35 °C for 15 min (from left to right): (1) control, (2) lactose, (3) sucrose, (4) maltose, (5) fructose, (6) glucose. ([TMB] = 120  $\mu\text{M}$ , [ $\text{CeO}_2$  NPs] = 4  $\mu\text{g/mL}$ , [GOx] = 1 unit/mL, [glucose] = 5 mM, [citrate buffer] = 40 mM, pH 6.0).

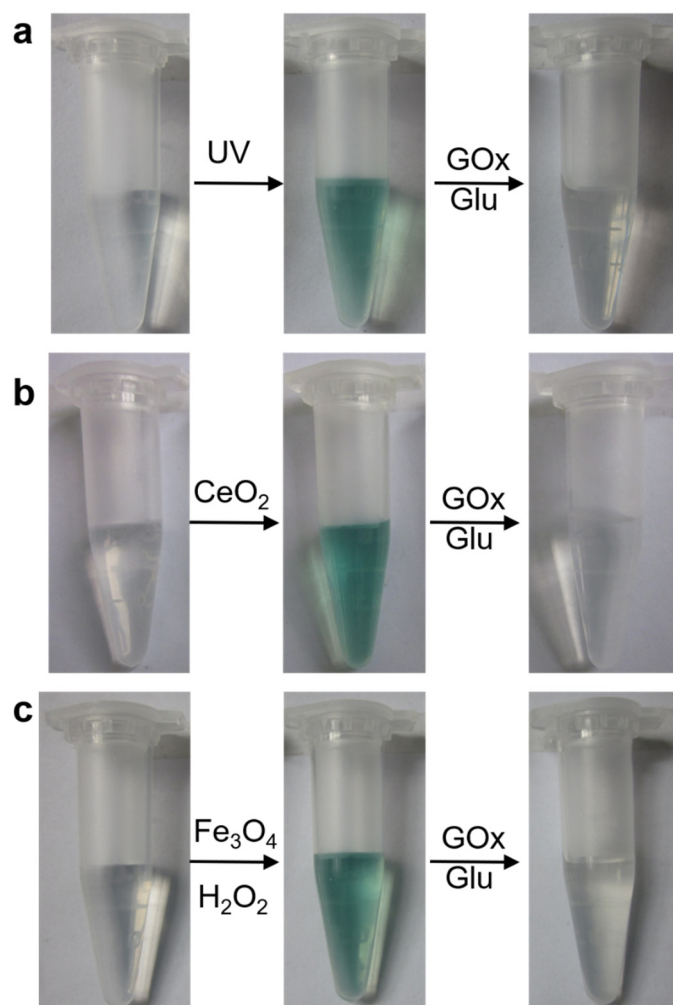

**Figure S5.** Typical photographs of ABTS reaction solutions at 35 °C for 15 min oxidized by (a) UV-light, ([ABTS] = 8 mM) (b) CeO<sub>2</sub>, ([ABTS] = 8 mM, [CeO<sub>2</sub> NPs] = 32 µg/mL) (c) Fe<sub>3</sub>O<sub>4</sub>/H<sub>2</sub>O<sub>2</sub>, and ABTS<sup>•+</sup> reaction solutions reduced by Gox/glucose. ([ABTS] = 20 mM, [Fe<sub>3</sub>O<sub>4</sub> NPs] = 40 µg/mL, [H<sub>2</sub>O<sub>2</sub>] = 50 mM, [GOx] = 4 units/mL, [glucose] = 20 mM, [citrate buffer] = 40 mM, pH 6.0).
